# Supplementary material
Source: PubMed Central journal article supplement (PMC9709711)

### Missing Covariates MAR Data

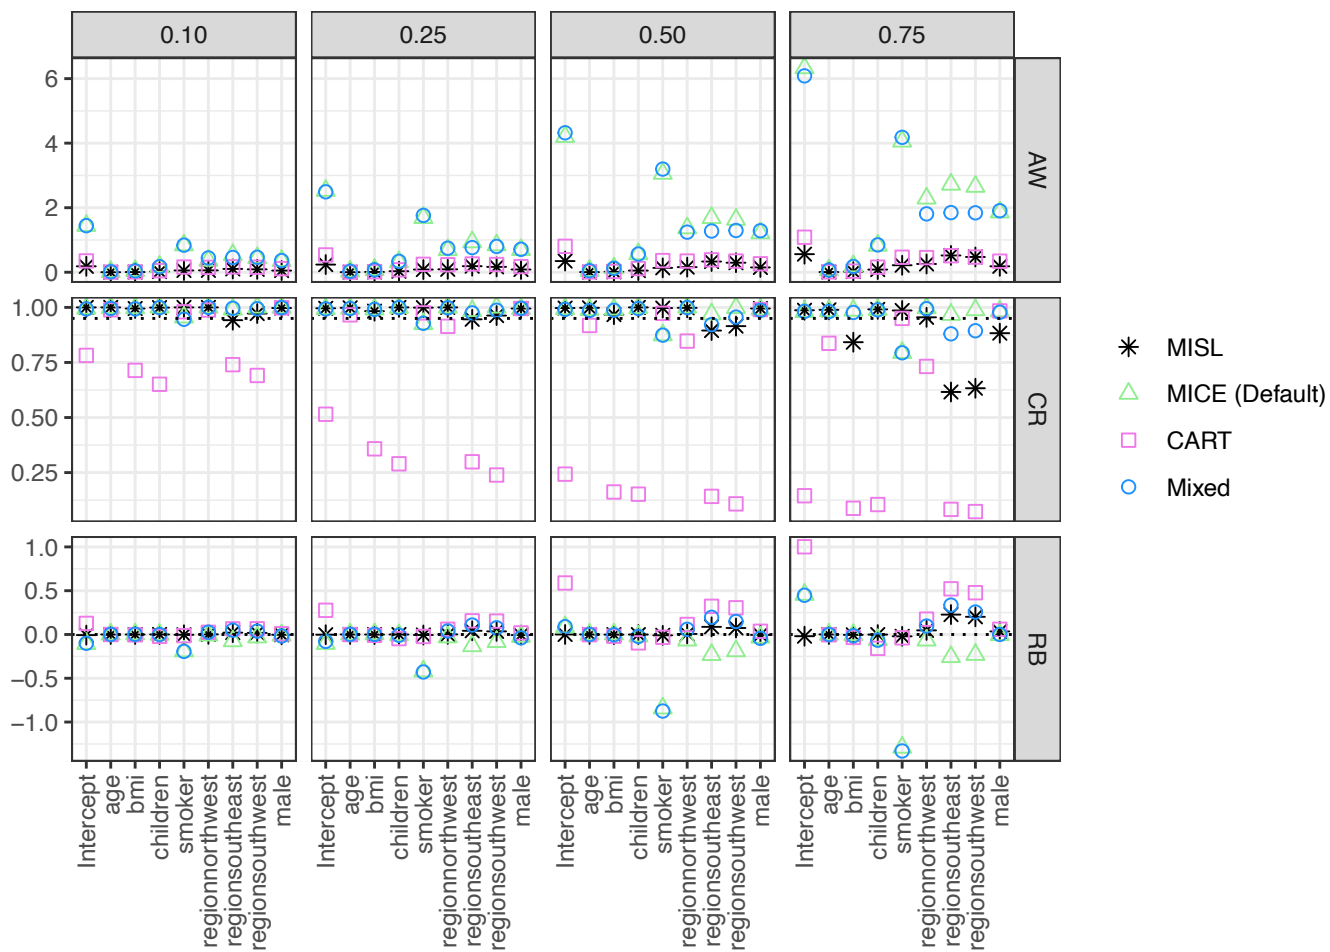



### Missing Mixed MCAR Data

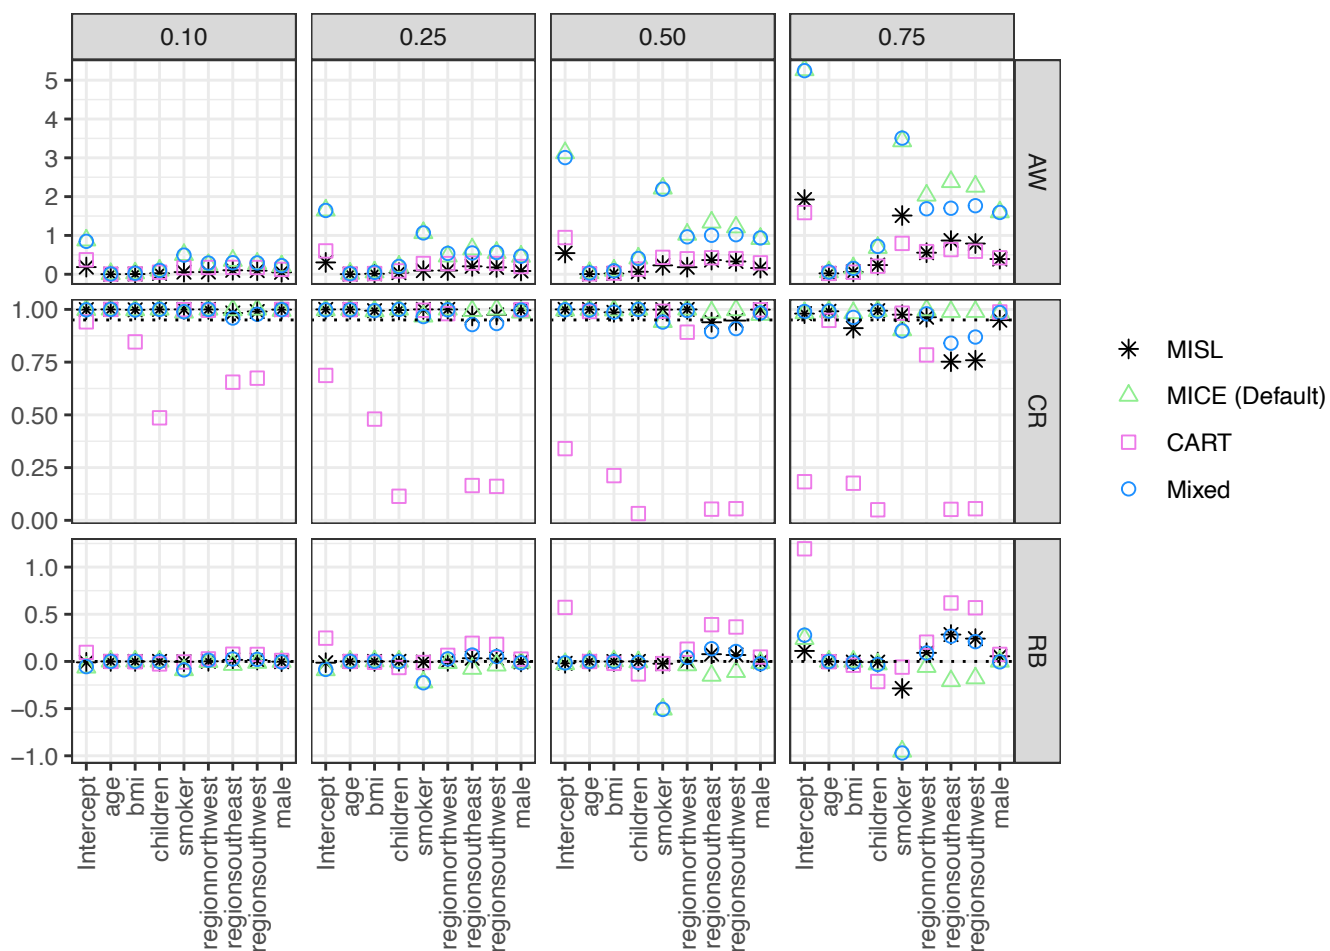

Supplement: NIHMS1847452-supplement-Supp_Figures.pdf [file NIHMS1847452-supplement-Supp_Figures.pdf]
